# Supplementary material for: Identification and Validation of UPF1 as a Novel Prognostic Biomarker in Renal Clear Cell Carcinoma
Source: Genes (Basel). 2022 Nov 20;13(11):2166. doi: 10.3390/genes13112166 (PMC9690017; doi:10.3390/genes13112166)
Supplement: Supplementary file 1 [file genes-13-02166-s001.zip › Table S1.Characteristics for the 24 study participants.xlsx]

## Sheet: Sheet1
Table S1.Characteristics for the 20 study participants
ID		Gender	Age	T	N	M	survival	Tumor size	Differentiation grade	Cancer type	Stage
1	qRT-PCR	female	57	2	1	X	1	7.5*6*6	2	clear cell renal cell carcinoma	T 2N1MX
2		female	53	2	0	0	0	8*5.5*4	2	clear cell renal cell carcinoma	T2N0M0
3		male	51	3	0	1	1	10*9*9	2-3	clear cell renal cell carcinoma	T3N0M1
4		male	74	1	0	0	1	3.5*2*2	2	clear cell renal cell carcinoma	T1AN0M0
5		male	40	2	0	0	0	7*6*5.5	2	clear cell renal cell carcinoma	T 2N0M0
6		male	67	1	0	0	1	4*3.5*2.5	2	clear cell renal cell carcinoma	T 1N0M0
7		male	54	1	0	0	0	2.3*2*2	2	clear cell renal cell carcinoma	PT1AN0M0
8		male	63	1	0	0	0	5*4*4 3*3*1	2	clear cell renal cell carcinoma	T 1N0M0
9		male	72	1	0	0	0	4*4*2	1	clear cell renal cell carcinoma	T1N0M0
10		female	52	2	0	0	0	8.5*6*5	2	clear cell renal cell carcinoma	T2N0N0
11	IHC	male	58	1	0	0	0	1.8*1.5*1.2		clear cell renal cell carcinoma	T 1N0M0
12		female	55	2	0	0	0	14*11*7	2	clear cell renal cell carcinoma	T2N0M0
13		male	42	1	0	0	0	4.5*3.5*3	2	clear cell renal cell carcinoma	T1BN0M0
14		male	42	1	0	0	0	6*5*4	1-2	clear cell renal cell carcinoma	T1N0M0
15		male	74	2	0	0	0	6*6*2	2	clear cell renal cell carcinoma	T 2N0M0Ⅱ
16		male	50	1	0	0	0	5*4*4	2	clear cell renal cell carcinoma	T1N0M0
17		female	40	1	0	1	1	10*9*5	3	clear cell renal cell carcinoma	T1bN0M1
18		male	63	1	0	0	0	3*3*2.5	2	clear cell renal cell carcinoma	T1aN0M0
19		male	71	1	0	0	0	3*2.5*2	2	clear cell renal cell carcinoma	T1aN0M0
20		male	59	2	0	0	0	13.5*12*10	2	clear cell renal cell carcinoma	T2N0M0
